# Supplementary material for: Triacylglycerols and Other Lipids Profiling of Hemp By-Products
Source: MDPI journal article supplement (doi:10.3390/molecules27072339), 2022-04-05

# Triacylglycerols and Other Lipids Profiling of Hemp By-Products

Arjun H. Banskota \*, Alysson Jones, Joseph P. M. Hui and Roumiana Stefanova

Aquatic and Crop Resource Development Research Centre, National Research Council  
Canada, 1411 Oxford Street, Halifax, Nova Scotia, B3H 3Z1, Canada

\*Correspondence: Arjun.Banskota@nrc-cnrc.gc.ca; Tel.: 1-902-426-7372

**Abstract:** Hemp seed by-products namely hemp cake (hemp meal) and hemp hulls were studied for their lipid content and composition. Total lipid content of hemp cake and hemp hulls were 13.1% and 17.5%, respectively. Oil extraction yields using hexane, on the other hand, were much lower in hemp cake (7.4%) and hemp hulls (12.1%). Oil derived from both hemp seeds and by-products were primarily composed of neutral lipids (>97.1%) mainly triacylglycerols (TAGs) determined by SPE and confirmed by NMR study. Linoleic acid was the major fatty acid present in oils derived from hemp by-products covering almost 55% followed by  $\alpha$ -linolenic acid covering around 18% of the total fatty acids. For the first time 47 intact TAGs were identified in the hemp oils using UPLC-HRMS. Among them TAGs with fatty acid acyl chain 18:3/18:2/18:2 and 18:3/18:2/18:1 were the major ones, followed by TAGs with fatty acid acyl chain of 18:3/18:3/18:2, 18:2/18:2/16:0, 18:2/18:2/18:1, 18:3/18:2:18:0, 18:2/18:2/18:0, 18:2/18:1/18:1 and 18:3/18:2:16:0. Besides TAGs, low levels of terpenes, carotenoids and cannabidiolic acid were also detected in the oils. Moreover, the oils extracted from hemp by-products possessed a dose-dependent DPPH radical scavenging property and their potencies were in a similar range compared to other vegetable oils.

**Keywords:** hemp seed by-products; hemp seed oil; hemp cake; hemp hulls; triacylglycerols; fatty acids; DPPH radical scavenging activity.

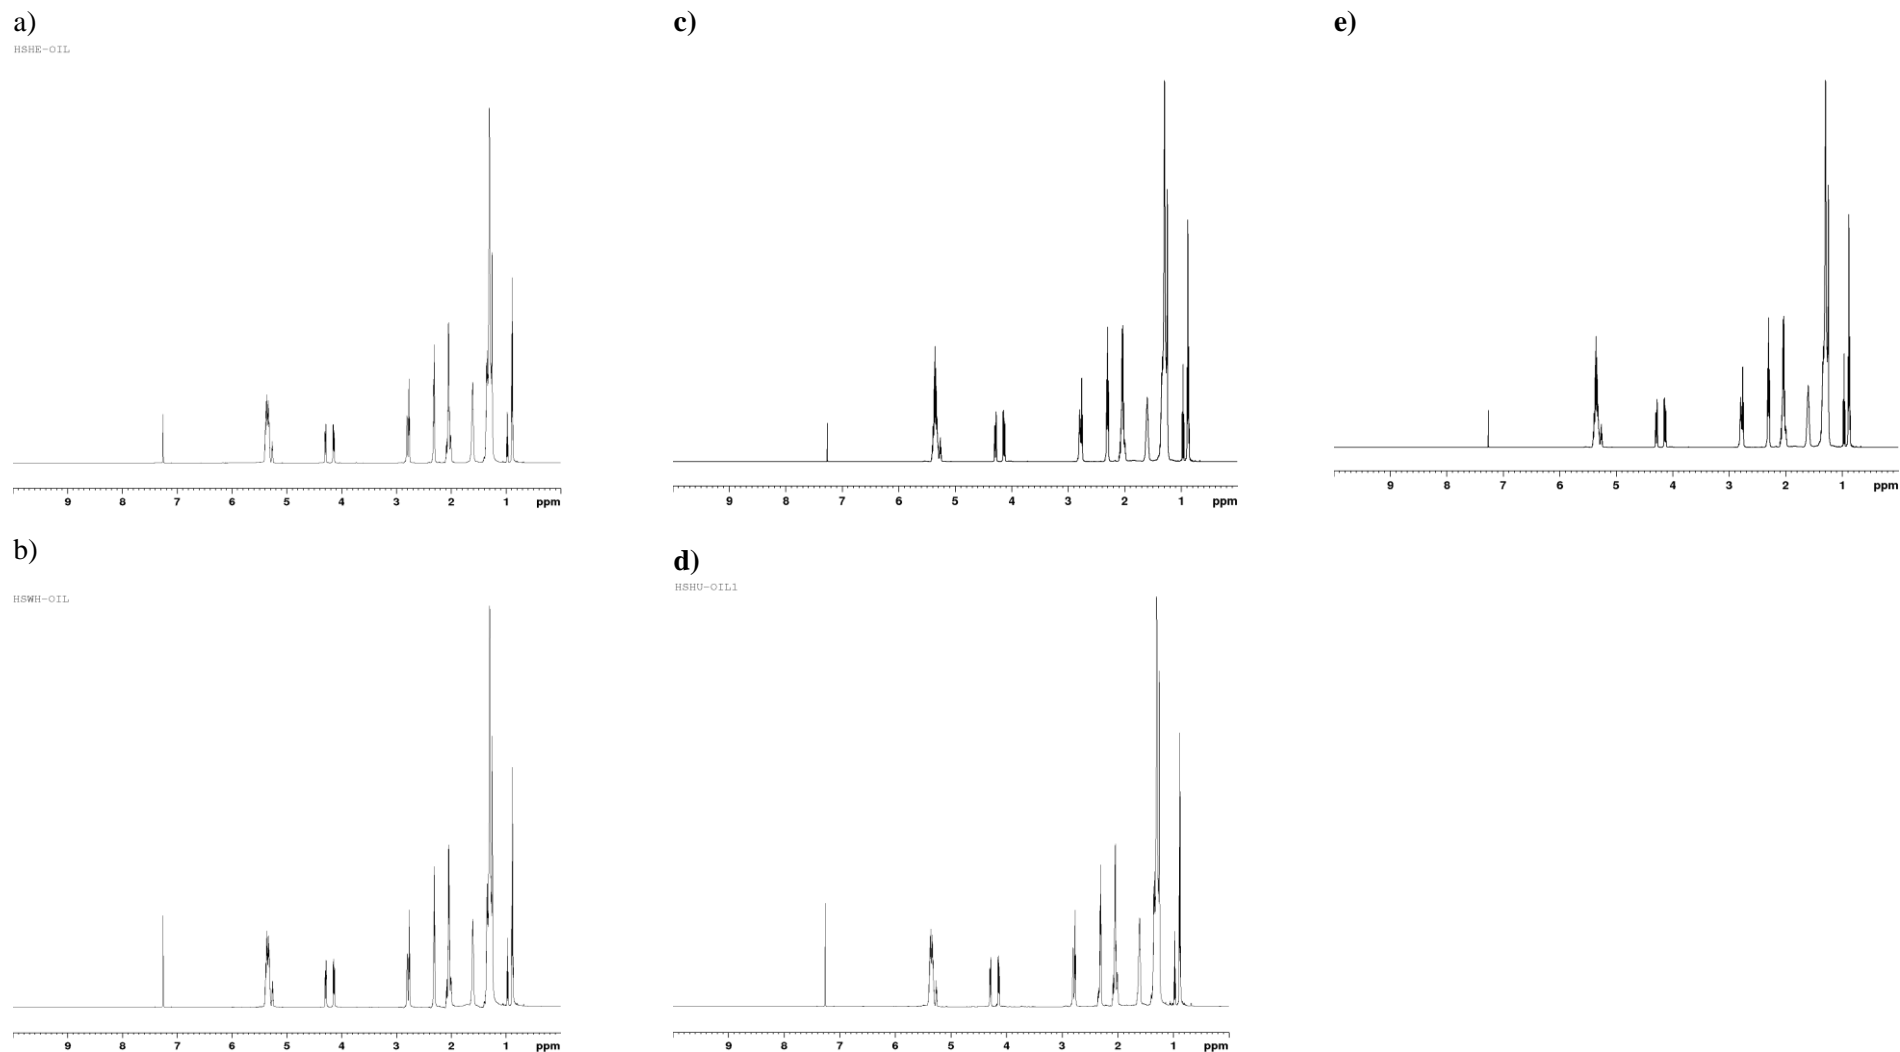

**Figure S1.**  $^1\text{H}$  NMR spectrum of oil extracted from and hemp seeds and hemp by-products recorded in 500/700 MHz NMR Spectrometer. a) hemp hearts, b) whole hemp seeds, c) hemp cake, d) hemp seed hulls and e) cold pressed hemp oil.

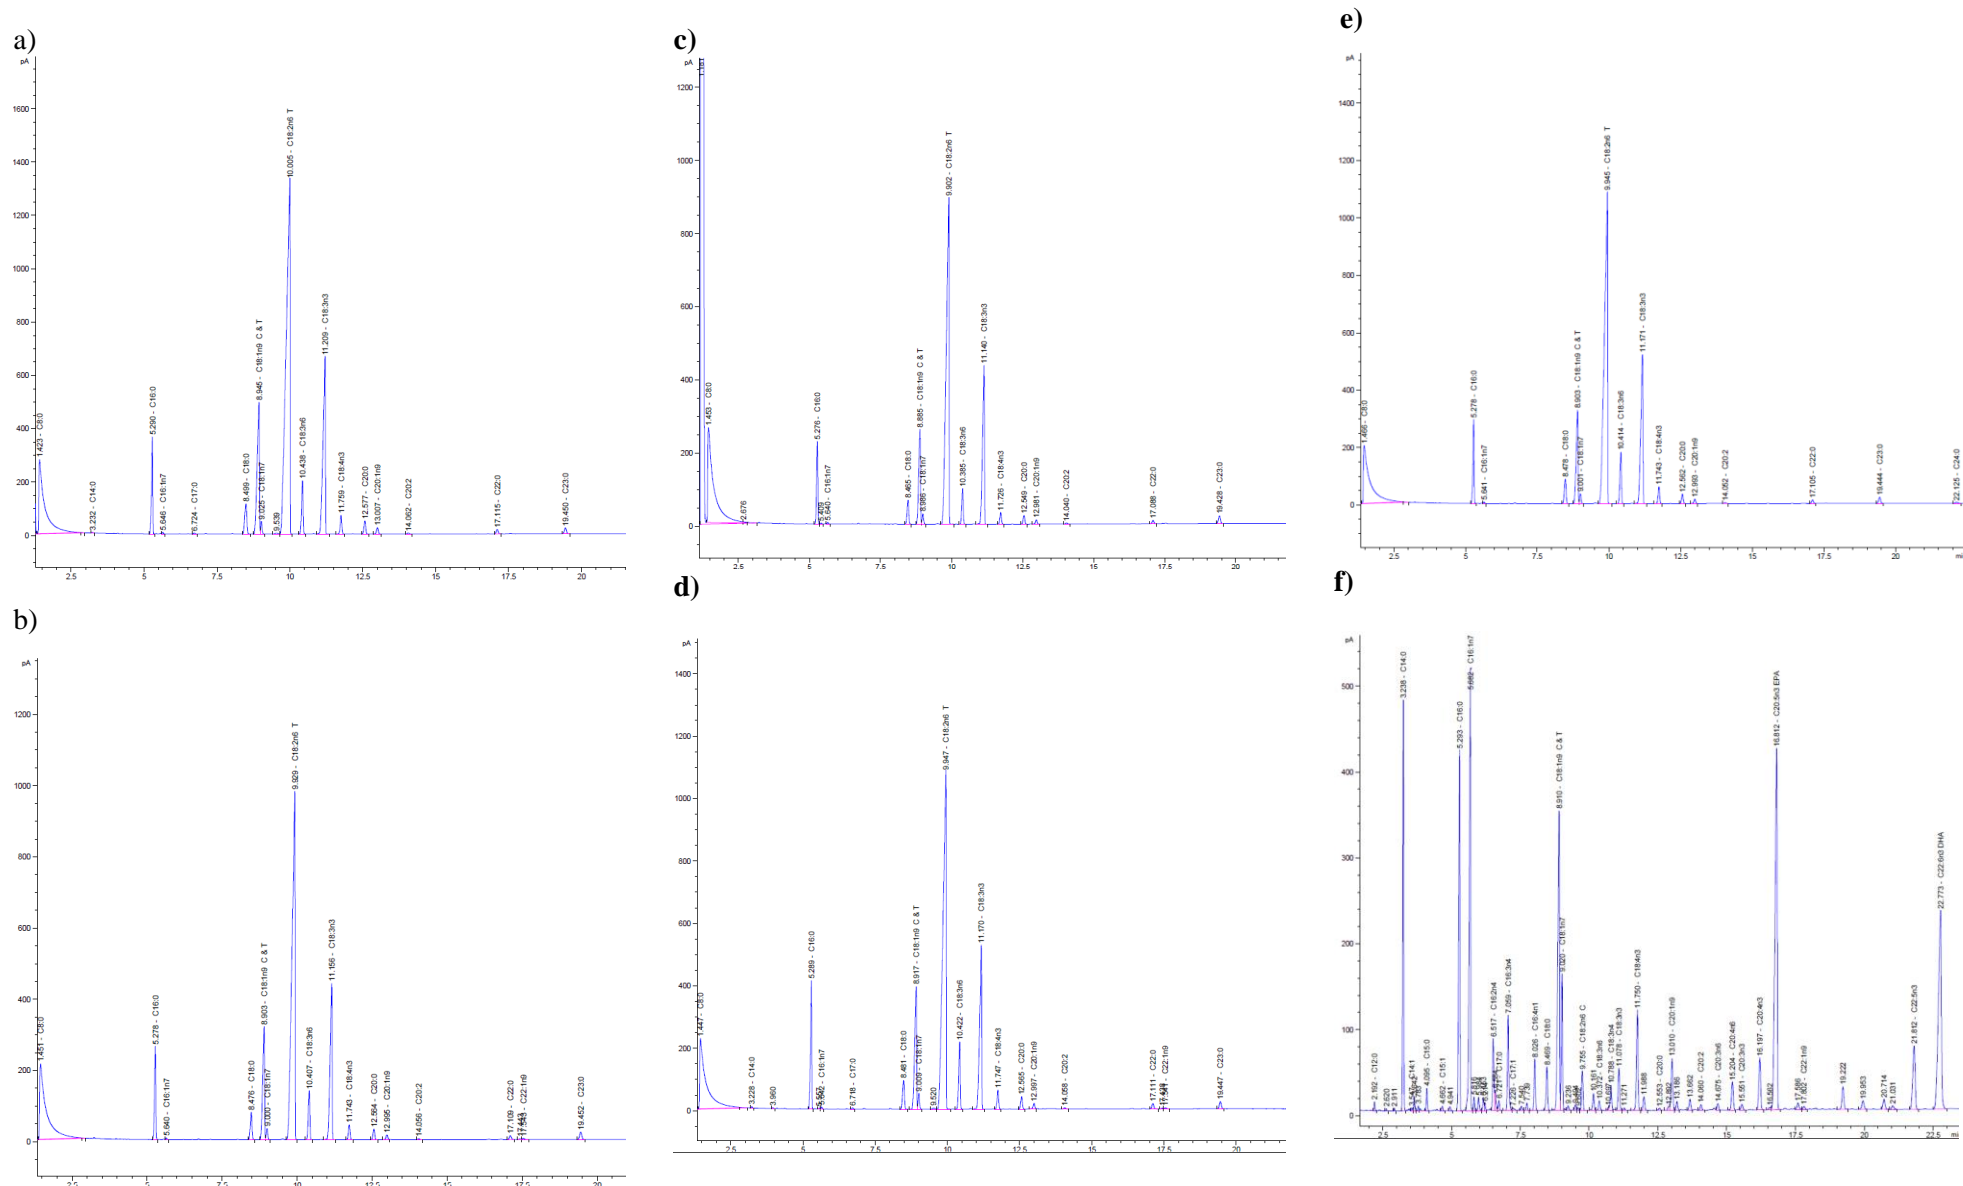

**Figure S2.** GC-FID of fatty acid analysis of oil extracted from hemp seeds and hemp by-products. a) hemp hearts, b) whole hemp seeds, c) hemp cake, d) hemp hulls, e) cold pressed hemp oil and f) PUFA standards.

a)

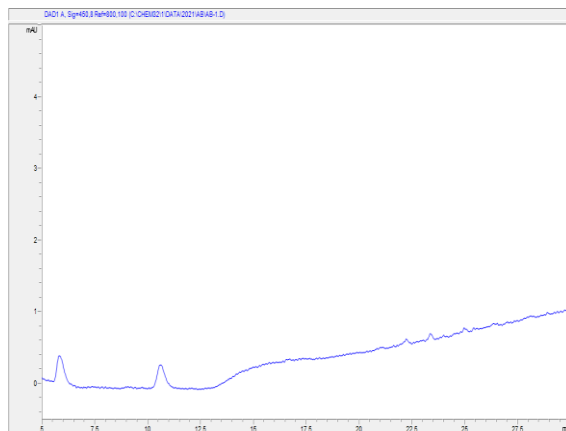

c)

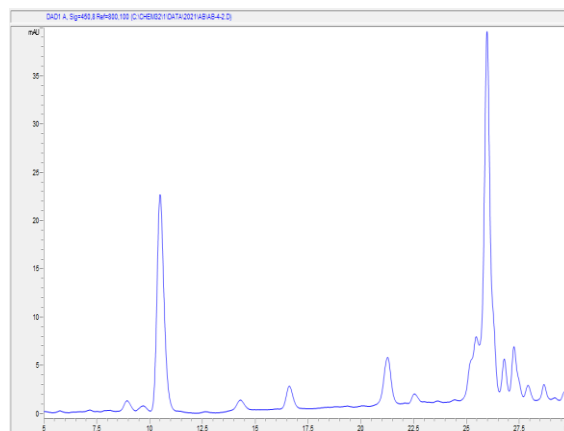

e)

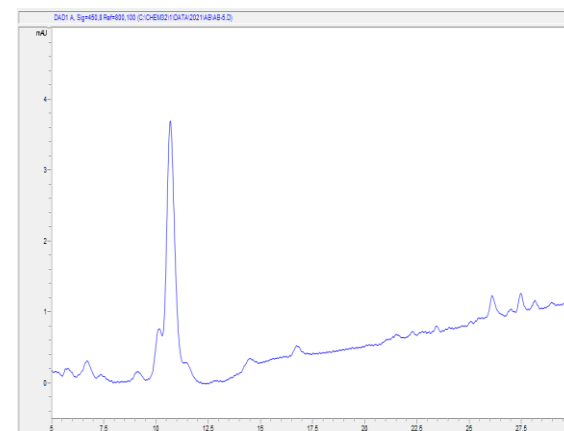

b)

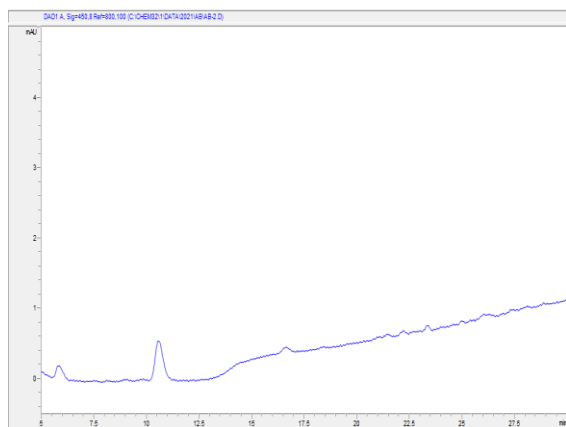

d)

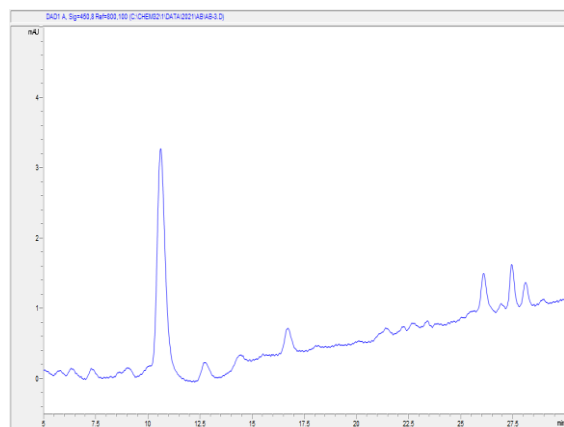

**Figure S3.** HPLC chromatograms of oils derived from hemp seeds and hemp seed by-products. Retention time lutein – 10.6 min,  $\alpha$ -carotene – 26.0 min and  $\beta$ -carotene – 27.4 min. a) hemp hearts, b) whole hemp seeds, c) hemp cake, d) hemp hulls, e) cold pressed hemp oil and f) PUFA standards.

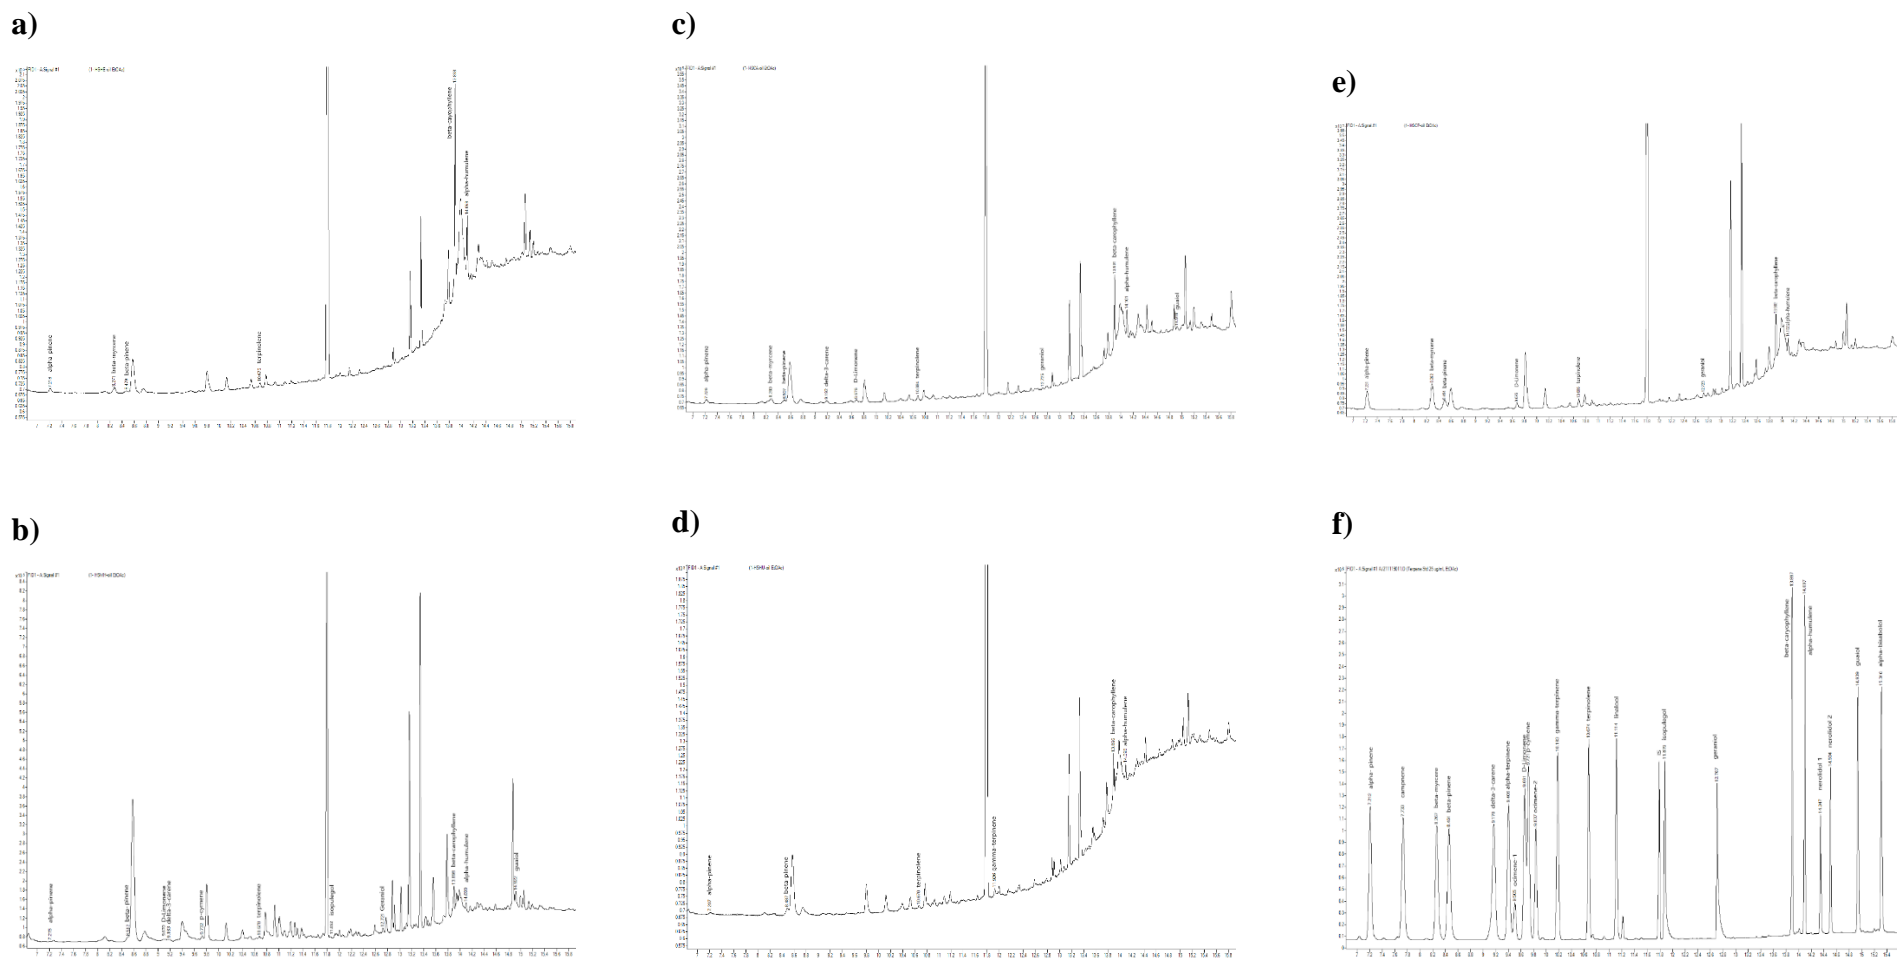

**Figure S4.** TIC of oils derived from hemp seeds and hemp by-products in GC-MS analysis. a) hemp hearts, b) whole hemp seeds, c) hemp cake, d) hemp hulls e) cold pressed hemp oil and f) standard terpenes.

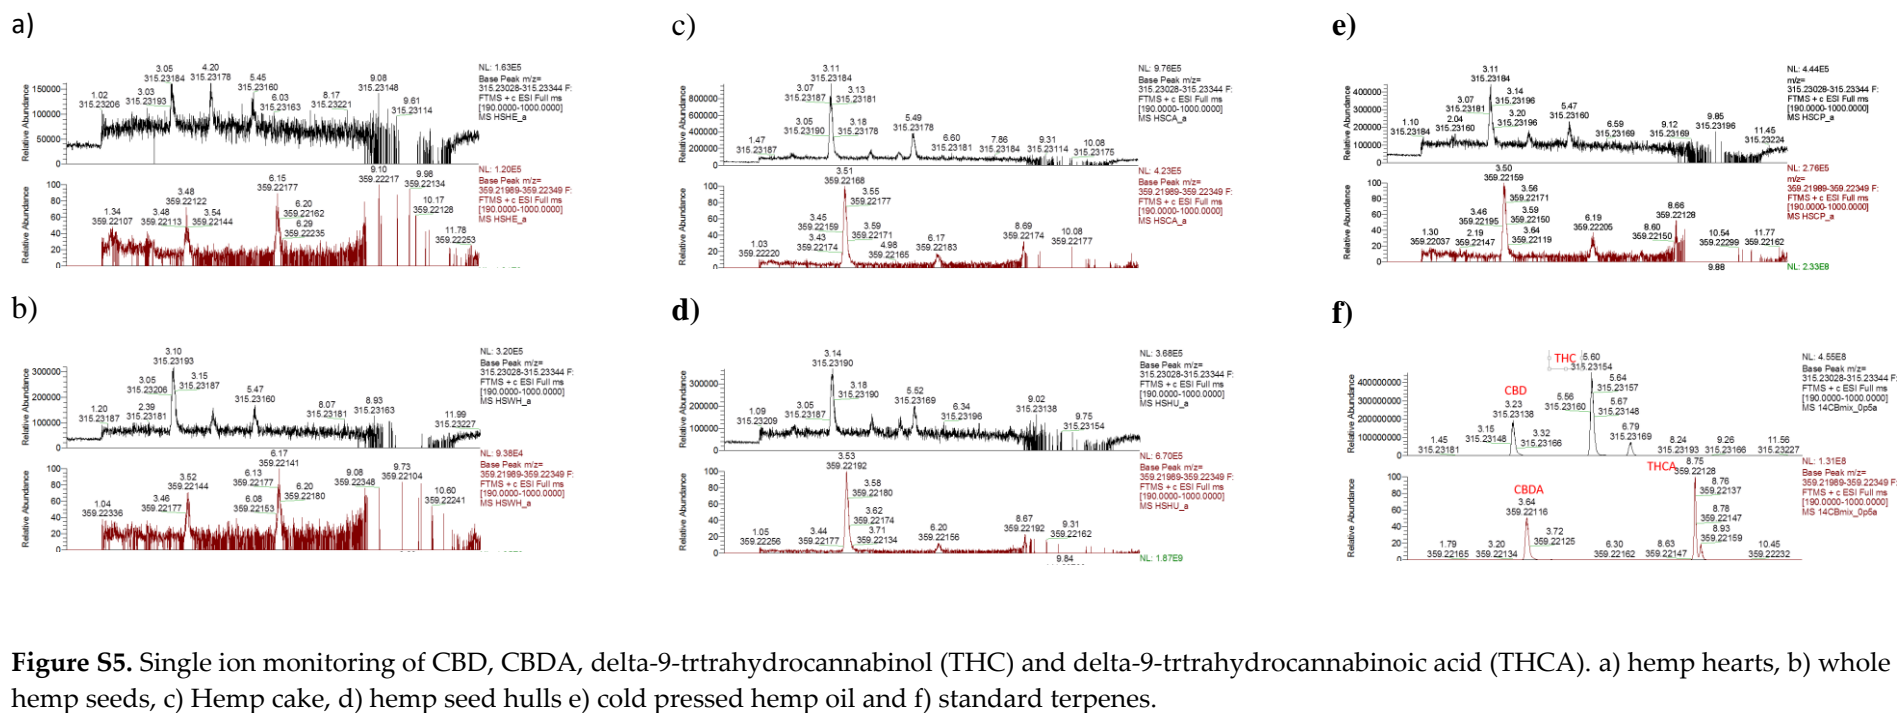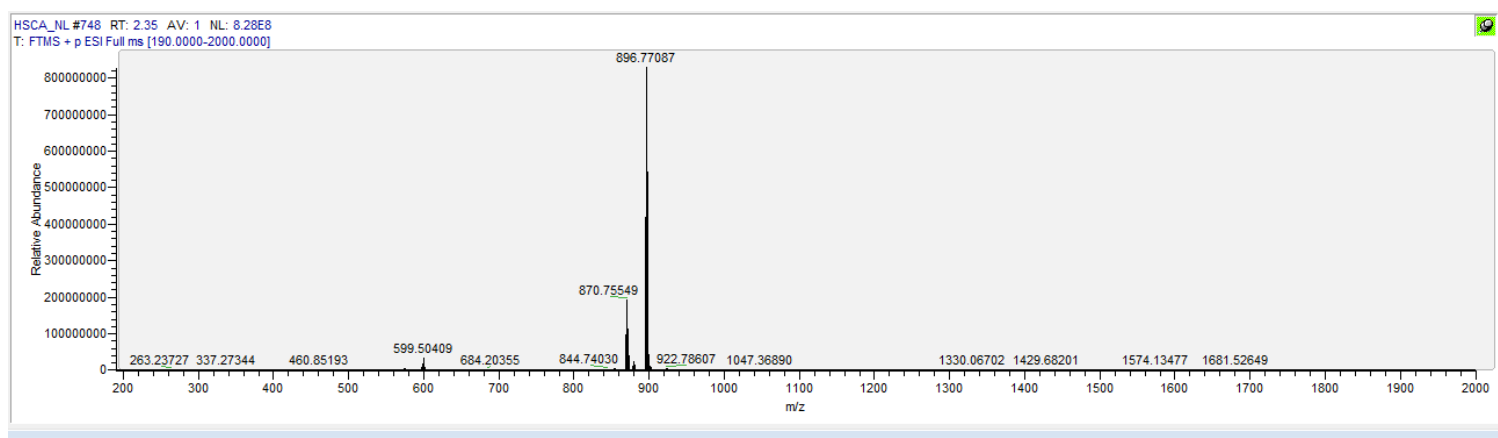

Supplement: s1 [file s1]
